# Supplementary material
Source: PubMed Central journal article supplement (PMC10230589)

Supplementary figure 1:

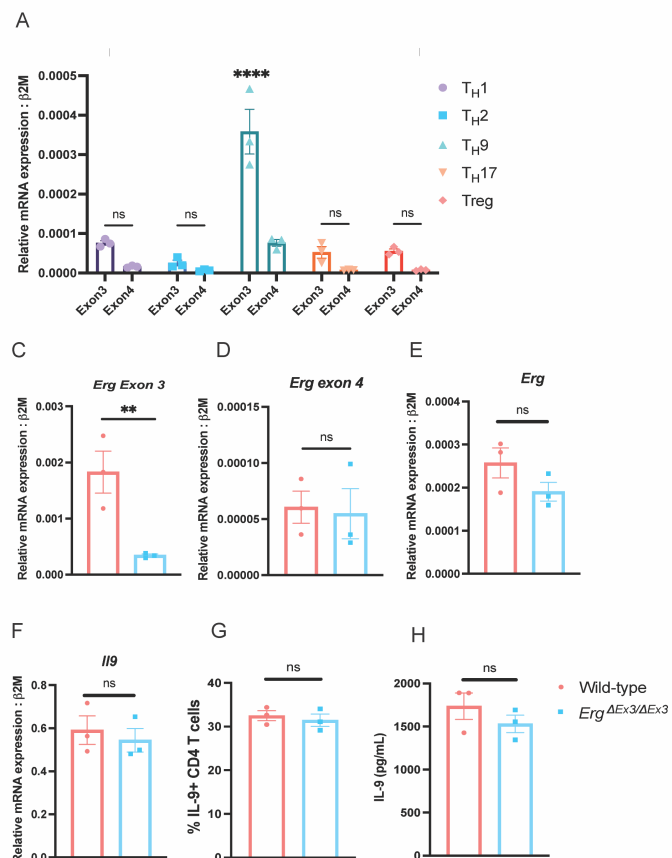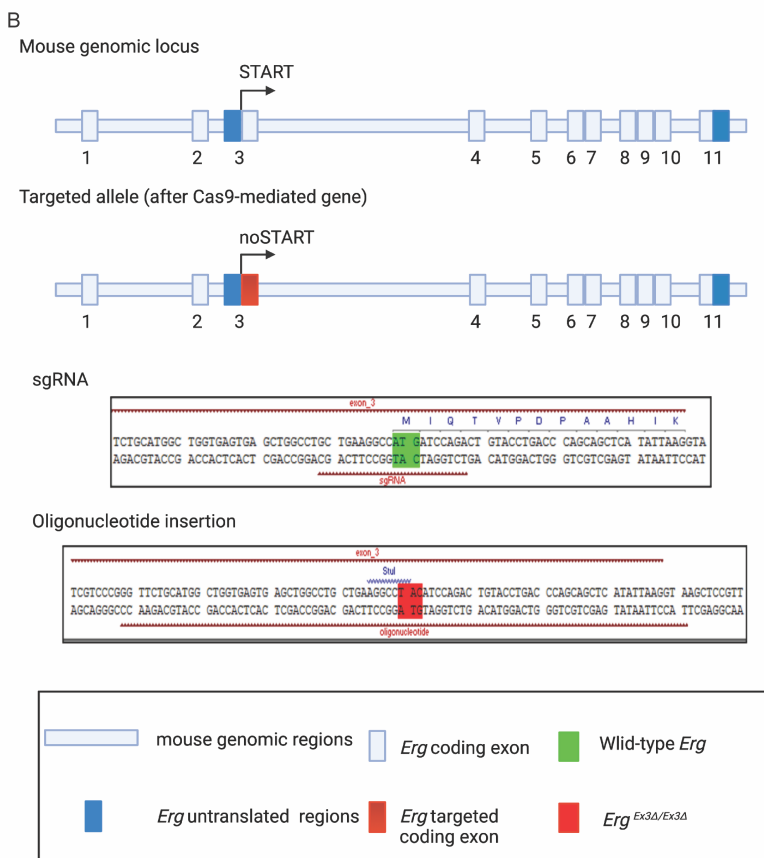

Supplementary figure 2:

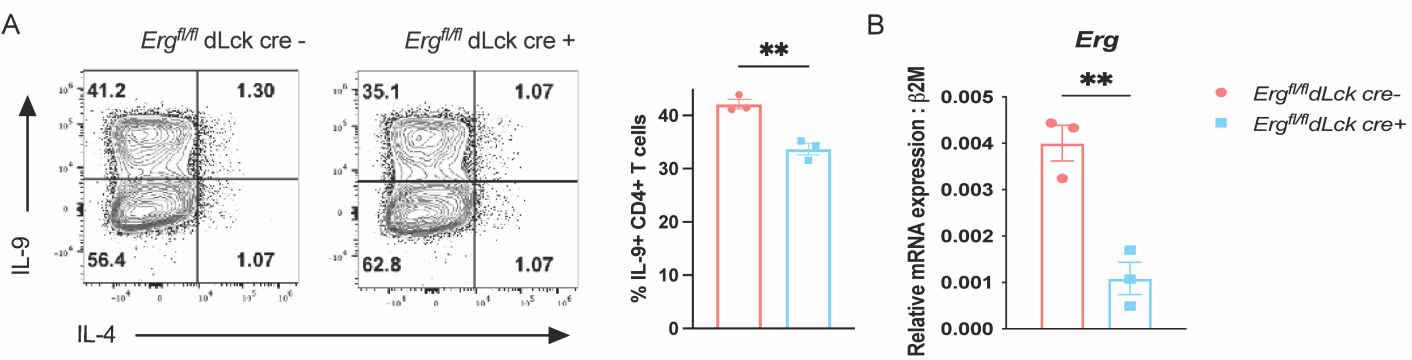

# Supplementary figure 3:

A

• Naive

• *Erg<sup>fl/fl</sup>* iCD4 cre- (TAM)

• *Erg<sup>fl/fl</sup>* iCD4 cre+ (TAM)

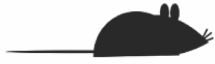

Week:

## Chronic allergic airway disease model (AAD)

25mg *Aspergillus fumigatus* (A.f.) i.n. administration

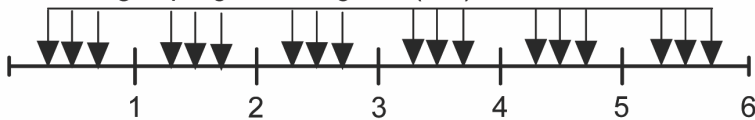

Tamoxifen (TAM) O.G. (10 days)  
(3mg/mouse)

B

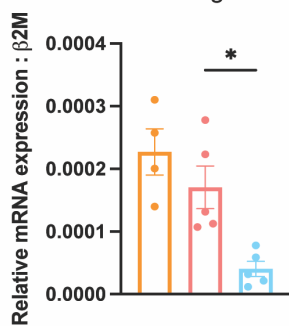

C

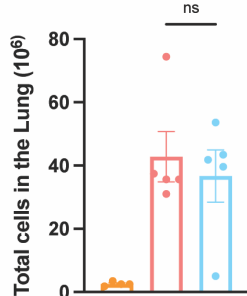

D

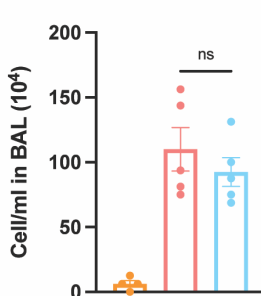

E

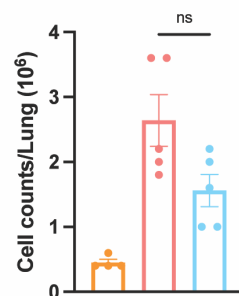

F

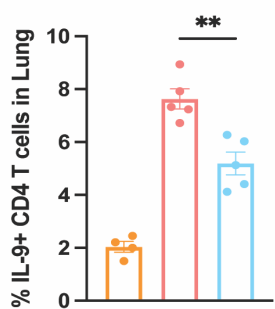

G

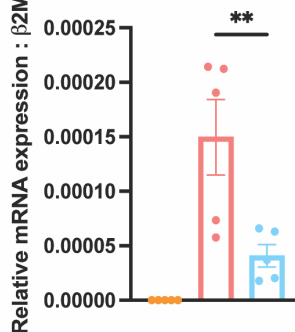

H

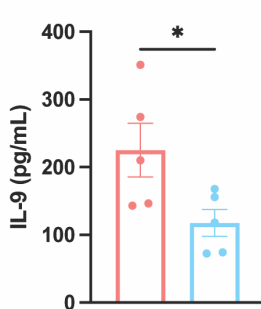

Supplement: NIHMS1899397-supplement-1.pdf [file NIHMS1899397-supplement-1.pdf]
